# Supplementary material
Source: PubMed Central journal article supplement (PMC2737945)
Supplement: supp_191_18_5793__1.pdf [file supp_191_18_5793__1.pdf]

**SUPPLEMENTAL TABLE 1: DIFFERENTIALLY EXPRESSED OPEN-READING FRAMES ORGANIZED BY CLUSTERS OF ORTHOLOGOUS GROUPS****ANIMO ACID TRANSPORT AND METABOLISM**

| <i>Gene #</i> | <i>ID</i> | <i>log<sub>2</sub>R</i> | <i>Absolute Z-score</i> | <i>Annotation</i>                                                           |
|---------------|-----------|-------------------------|-------------------------|-----------------------------------------------------------------------------|
| DVU0171       | patB      | 1.09                    | 1.83                    | hemolysin-related protein                                                   |
| DVU0291       | potA      | -0.88                   | 1.49                    | ABC transporter, ATP-binding protein                                        |
| DVU0388       |           | 0.63                    | 1.12                    | amino acid ABC transporter, ATP-binding protein                             |
| DVU0462       |           | 1.10                    | 1.72                    | chorismate mutase/prephenate dehydratase                                    |
| DVU0463       | aroA      | 0.75                    | 1.19                    | 3-phosphoshikimate 1-carboxyvinyltransferase                                |
| DVU0464       |           | 0.90                    | 1.55                    | prephenate dehydrogenase                                                    |
| DVU0551       | livF      | -0.69                   | 1.03                    | high-affinity branched-chain amino acid ABC transporter ATP-binding protein |
| DVU0626       | ilvN-1    | -0.69                   | 1.21                    | acetolactate synthase, small subunit                                        |
| DVU0671       |           | 0.86                    | 1.39                    | conserved hypothetical protein                                              |
| DVU0716       | livF      | -0.97                   | 1.61                    | branched-chain amino acid ABC transporter, ATP-binding protein              |
| DVU0738       |           | -0.61                   | 1.06                    | substrate-binding protein, putative                                         |
| DVU0841       |           | 0.64                    | 1.14                    | aspartate aminotransferase, putative                                        |
| DVU1388       |           | -0.92                   | 1.41                    | conserved hypothetical protein                                              |
| DVU1665       | aroQ      | -0.59                   | 1.02                    | 3-dehydroquinate dehydratase, type II                                       |
| DVU1766       | aspA      | 0.74                    | 1.02                    | aspartate ammonia-lyase, putative                                           |
| DVU1821       | gltB      | -0.78                   | 1.30                    | glutamate synthase, large subunit                                           |
| DVU1823       | gltB-1    | -0.77                   | 1.11                    | glutamate synthase, iron-sulfur cluster-binding subunit, putative           |
| DVU1878       | ltaE      | 0.94                    | 1.42                    | threonine aldolase, low-specificity                                         |
| DVU2204       | tnaA      | -0.83                   | 1.02                    | tryptophanase                                                               |
| DVU2297       |           | -2.48                   | 3.69                    | glycine/betaine/L-proline ABC transporter, periplasmic-binding protein      |
| DVU2298       | opuBB     | -1.99                   | 2.84                    | glycine/betaine/L-proline ABC transporter, permease protein                 |
| DVU2299       | proV      | -2.22                   | 2.90                    | glycine/betaine/L-proline ABC transporter, ATP binding protein              |
| DVU2340       |           | -0.80                   | 1.29                    | amino acid ABC transporter, permease protein, His/Glu/Gln/Arg/opine         |
| DVU2342       |           | -1.31                   | 1.45                    | amino acid ABC transporter, periplasmic amino acid-binding protein          |
| DVU2343       | glnQ      | -0.83                   | 1.15                    | amino acid ABC transporter, ATP-binding protein                             |
| DVU2384       |           | -2.44                   | 2.50                    | ABC transporter, periplasmic substrate-binding protein                      |
| DVU2476       | gltA      | 0.77                    | 1.19                    | glutamate synthase, small subunit                                           |
| DVU2540       |           | 1.06                    | 1.26                    | lyase, putative                                                             |
| DVU2575       |           | -0.63                   | 1.05                    | peptidase, M20/M25/M40 family                                               |
| DVU2741       | livG      | 1.01                    | 1.33                    | high-affinity branched chain amino acid ABC transporter, ATP-binding        |
| DVU3121       |           | -0.68                   | 1.05                    | aminotransferase, class V                                                   |
| DVUA0063      |           | 1.68                    | 1.59                    | Orn/DAP/Arg family decarboxylase                                            |

**CARBOHYDRATE TRANSPORT AND METABOLISM**

| <i>Gene #</i> | <i>ID</i> | <i>log<sub>2</sub>R</i> | <i>Absolute Z-score</i> | <i>Annotation</i>                                      |
|---------------|-----------|-------------------------|-------------------------|--------------------------------------------------------|
| DVU0342       |           | 0.76                    | 1.28                    | NAD-dependent epimerase/dehydratase family protein     |
| DVU0343       |           | 0.56                    | 1.01                    | HPCH/HPAI aldolase family protein                      |
| DVU0565       | gap-1     | -0.79                   | 1.22                    | glyceraldehyde 3-phosphate dehydrogenase               |
| DVU0632       |           | 0.75                    | 1.33                    | cupin family protein                                   |
| DVU2349       |           | -0.82                   | 1.51                    | carbohydrate phosphorylase family protein              |
| DVU2822       |           | 0.74                    | 1.02                    | TRAP dicarboxylate family transporter                  |
| DVU2935       | gpm       | -0.88                   | 1.57                    | phosphoglycerate mutase                                |
| DVU3162       |           | 0.76                    | 1.02                    | ABC transporter, periplasmic substrate-binding protein |
| DVU3214       |           | 0.68                    | 1.14                    | phosphoenolpyruvate synthase-related protein           |
| DVU3373       | ilvD      | 0.93                    | 1.73                    | dihydroxy-acid dehydratase                             |
| DVUA0096      |           | 1.99                    | 1.00                    | major facilitator superfamily protein                  |

**CELL CYCLE CONTROL, CELL DIVISION, CHROMOSOME PARTITIONING**

| <i>Gene #</i> | <i>ID</i> | <i>log<sub>2</sub>R</i> | <i>Absolute Z-score</i> | <i>Annotation</i>                  |
|---------------|-----------|-------------------------|-------------------------|------------------------------------|
| DVU2109       | mrp       | -3.20                   | 4.66                    | MTH1175-like domain family protein |
| DVU2330       |           | -0.84                   | 1.57                    | MRP family protein                 |
| DVU3374       |           | 0.69                    | 1.25                    | permease, putative                 |

**CELL MOTILITY**

| <i>Gene #</i> | <i>ID</i> | <i>log<sub>2</sub>R</i> | <i>Absolute Z-score</i> | <i>Annotation</i>                                      |
|---------------|-----------|-------------------------|-------------------------|--------------------------------------------------------|
| DVU0049       |           | 1.08                    | 1.88                    | OmpA family protein                                    |
| DVU0302       |           | -1.77                   | 2.26                    | chemotaxis protein CheX, putative                      |
| DVU0312       | fliG      | 0.77                    | 1.22                    | flagellar motor switch protein FliG                    |
| DVU0315       | flgC      | 2.82                    | 4.30                    | flagellar basal-body rod protein FlgC                  |
| DVU0316       | flgB      | 2.68                    | 3.94                    | flagellar basal-body rod protein FlgB                  |
| DVU0520       |           | 0.60                    | 1.10                    | flagellar hook-associated protein FlgL, putative       |
| DVU0591       | mcpD      | -0.75                   | 1.34                    | methyl-accepting chemotaxis protein                    |
| DVU0592       | cheW-1    | -0.92                   | 1.60                    | chemotaxis protein CheW                                |
| DVU0806       |           | -2.59                   | -3.01                   | chemotaxis protein CheY, putative                      |
| DVU1441       | flaB1     | 0.68                    | 1.23                    | flagellin                                              |
| DVU1592       |           | -1.47                   | 2.51                    | arginine N-succinyltransferase, beta subunit, putative |
| DVU1594       | cheA-1    | -1.63                   | 2.63                    | chemotaxis protein CheA                                |
| DVU1595       | cheR-1    | -0.79                   | 1.45                    | chemotaxis protein methyltransferase                   |
| DVU1596       | cheB-1    | -1.00                   | 1.85                    | protein-glutamate methylesterase CheB                  |
| DVU2074       |           | -0.71                   | 1.03                    | chemotaxis protein CheW                                |
| DVU2076       | cheR-2    | -0.65                   | 1.08                    | chemotaxis protein methyltransferase                   |
| DVU2078       | cheB-2    | -0.74                   | 1.23                    | protein-glutamate methylesterase CheB                  |
| DVU2444       | flaB3     | 2.26                    | 3.95                    | flagellin                                              |
| DVU2585       |           | -0.61                   | 1.10                    | methyl-accepting chemotaxis protein                    |
| DVU2738       |           | -0.94                   | 1.44                    | methyl-accepting chemotaxis protein                    |

**CELL WALL/MEMBRANE/ENVELOPE BIOGENESIS**

| <i>Gene #</i> | <i>ID</i> | <i>log<sub>2</sub>R</i> | <i>Absolute Z-score</i> | <i>Annotation</i>                                                     |
|---------------|-----------|-------------------------|-------------------------|-----------------------------------------------------------------------|
| DVU0150       |           | 7.35                    | 12.21                   | membrane protein, putative                                            |
| DVU0437       |           | 0.81                    | 1.25                    | efflux transporter, RND family, MFP subunit                           |
| DVU0677       |           | -0.57                   | 1.01                    | transglycosylase domain protein                                       |
| DVU0698       | rfbC      | -1.19                   | 2.19                    | dTDP-4-dehydrorhamnose 3,5-epimerase                                  |
| DVU0925       | rfbA      | -0.90                   | 1.60                    | glucose-1-phosphate thymidyltransferase                               |
| DVU1214       |           | 0.60                    | 1.07                    | dolichyl-phosphate-mannose-protein mannosyltransferase family protein |
| DVU1668       | lolA      | -0.62                   | 1.05                    | outer membrane lipoprotein carrier protein, putative                  |
| DVU1892       |           | -0.70                   | 1.29                    | glycosyl transferase, group 2 family protein                          |
| DVU2336       |           | 0.81                    | 1.26                    | carboxyl-terminal protease                                            |
| DVU2371       | amiA      | -0.57                   | 1.05                    | N-acetylmuramoyl-L-alanine amidase, putative                          |
| DVU2390       |           | -2.34                   | 3.23                    | TonB domain protein                                                   |
| DVU2655       | dacA      | 0.75                    | 1.17                    | D-alanyl-D-alanine carboxypeptidase family protein                    |
| DVU3013       | dmt       | 0.61                    | 1.04                    | glycosyl transferase, group 2 family protein                          |
| DVU3104       | pal       | 0.78                    | 1.36                    | peptidoglycan-associated lipoprotein, putative                        |
| DVU3246       |           | -0.69                   | 1.08                    | RND efflux system, outer membrane protein, NodT family                |
| DVU3247       |           | -0.90                   | 1.12                    | efflux transporter, RND family, MFP subunit                           |
| DVUA0048      |           | 4.25                    | 2.35                    | exopolysaccharide production protein, putative                        |

**COENZYME TRANSPORT AND METABOLISM**

| <i>Gene #</i> | <i>ID</i> | <i>log<sub>2</sub>R</i> | <i>Absolute Z-score</i> | <i>Annotation</i>       |
|---------------|-----------|-------------------------|-------------------------|-------------------------|
| DVU0100       |           | -0.64                   | 1.07                    | TonB-dependent receptor |

|         |        |       |      |                                                                                 |
|---------|--------|-------|------|---------------------------------------------------------------------------------|
| DVU0323 | folD   | 0.58  | 1.06 | methylenetetrahydrofolate dehydrogenase/methenyltetrahydrofolate cyclohydrolase |
| DVU0607 | ahcY   | -0.75 | 1.33 | adenosylhomocysteinase                                                          |
| DVU0650 |        | -2.56 | 2.85 | chelataase, putative                                                            |
| DVU0745 |        | -1.83 | 1.29 | ABC transporter, periplasmic substrate-binding protein                          |
| DVU0951 | moeA-2 | -0.79 | 1.33 | molybdopterin biosynthesis MoeA protein, putative                               |
| DVU1411 | thiC   | 1.52  | 2.54 | thiamine biosynthesis protein ThiC                                              |
| DVU1765 | thiH   | 1.17  | 1.12 | thiH protein, putative                                                          |
| DVU2448 | panC   | -0.57 | 1.02 | pantoate--beta-alanine ligase                                                   |
| DVU2449 | metK   | -0.84 | 1.51 | S-adenosylmethionine synthetase                                                 |
| DVU2558 | bioB   | 0.78  | 1.27 | biotin synthase                                                                 |
| DVU2564 | bioF   | -0.63 | 1.04 | 8-amino-7-oxononanoate synthase                                                 |
| DVU2798 |        | -0.76 | 1.27 | ApbE family protein                                                             |
| DVU2882 | folC   | -1.27 | 2.09 | folylpolyglutamate synthase                                                     |
| DVU3279 | cobT   | -0.61 | 1.05 | nicotinate-nucleotide--dimethylbenzimidazole phosphoribosyltransferase          |
| DVU3293 |        | -0.75 | 1.19 | thiamine pyrophosphate-requiring enzyme                                         |

**DEFENSE MECHANISMS**

| Gene #   | ID    | $\log_2R$ | Absolute Z-score | Annotation                                            |
|----------|-------|-----------|------------------|-------------------------------------------------------|
| DVU0126  | b3486 | 1.25      | 1.52             | ABC transporter, ATP-binding protein                  |
| DVU1017  | rtxB  | -0.76     | 1.28             | ABC transporter, ATP-binding protein/permease protein |
| DVU1018  | rtxD  | -0.59     | 1.00             | type I secretion membrane fusion protein, HlyD family |
| DVU2294  |       | 0.85      | 1.06             | femAB family protein                                  |
| DVU2380  | atpX  | -3.02     | 4.75             | ABC transporter, ATP-binding protein                  |
| DVU2437  |       | -1.06     | 1.62             | ABC transporter, permease protein                     |
| DVU3248  |       | -0.92     | 1.39             | AcrB/AcrD/AcrF family protein                         |
| DVUA0023 |       | 2.60      | 1.37             | ABC transporter, permease protein, putative           |

**ENERGY PRODUCTION AND CONSERVATION**

| Gene #  | ID     | $\log_2R$ | Absolute Z-score | Annotation                                                                                                                    |
|---------|--------|-----------|------------------|-------------------------------------------------------------------------------------------------------------------------------|
| DVU0019 | ngr    | 0.82      | 1.39             | nigerythrin                                                                                                                   |
| DVU0080 | fumC   | -0.63     | 1.04             | fumarate hydratase, class II                                                                                                  |
| DVU0172 | phsB   | 0.67      | 1.06             | thiosulfate reductase (phsB)                                                                                                  |
| DVU0173 | phsA   | 2.08      | 3.41             | thiosulfate reductase                                                                                                         |
| DVU0253 |        | -1.21     | 1.97             | oxidoreductase, FAD/iron-sulfur cluster-binding domain protein                                                                |
| DVU0381 | nhaC-1 | 0.87      | 1.21             | Na <sup>+</sup> /H <sup>+</sup> antiporter NhaC                                                                               |
| DVU0402 | dsrA   | 0.94      | 1.56             | dissimilatory sulfite reductase alpha subunit                                                                                 |
| DVU0403 | dvsB   | 0.81      | 1.19             | dissimilatory sulfite reductase beta subunit                                                                                  |
| DVU0531 | hmcF   | 1.93      | 2.76             | HmcF, 52.7 kd protein in hmc operon                                                                                           |
| DVU0534 | hmcC   | 1.53      | 2.31             | HmcC, 43.2 kd protein in hmc operon                                                                                           |
| DVU0535 | hmcB   | 1.83      | 2.62             | 40.1 kd protein in hmc operon (HmcB)                                                                                          |
| DVU0627 | ptB    | -0.64     | 1.03             | phosphotransbutyrylase                                                                                                        |
| DVU0692 |        | 0.93      | 1.62             | molybdopterin oxidoreductase, transmembrane subunit, putative                                                                 |
| DVU0693 | narH   | 0.77      | 1.24             | molybdopterin oxidoreductase, iron-sulfur cluster-binding subunit, putative (TIGR), containing cytochrome c heme-binding site |
| DVU0694 |        | 0.98      | 1.73             | molybdopterin oxidoreductase, molybdopterin-binding subunit, putative                                                         |
| DVU0701 | glcB   | -0.80     | 1.45             | malate synthase G                                                                                                             |
| DVU0774 | atpC   | 0.74      | 1.21             | ATP synthase, F1 epsilon subunit                                                                                              |
| DVU0775 | atpD   | 0.92      | 1.53             | ATP synthase, F1 beta subunit                                                                                                 |
| DVU0778 | atpH   | 0.85      | 1.33             | ATP synthase, F1 delta subunit                                                                                                |
| DVU0847 | ApsA   | 1.21      | 1.20             | adenylyl-sulphate reductase, alpha subunit                                                                                    |
| DVU0849 | QmoB   | 0.92      | 1.27             | Quinone-interacting membrane-bound oxidoreductase                                                                             |
| DVU0917 | atpE   | 0.95      | 1.60             | ATP synthase F0, C subunit                                                                                                    |
| DVU0918 | atpB   | 0.81      | 1.29             | ATP synthase F0, A subunit                                                                                                    |
| DVU1179 | aor    | 1.93      | 1.91             | aldehyde:ferredoxin oxidoreductase, tungsten-containing                                                                       |
| DVU1423 | lpdA   | 1.01      | 1.35             | 2-oxoglutarate dehydrogenase, E3 component, lipamide dehydrogenase                                                            |
| DVU1636 | ppaC   | 1.38      | 1.82             | inorganic pyrophosphatase, manganese-dependent                                                                                |

|         |        |       |      |                                                            |
|---------|--------|-------|------|------------------------------------------------------------|
| DVU1770 | hydB   | 2.06  | 1.54 | periplasmic [Fe] hydrogenase, small subunit                |
| DVU1782 |        | -0.67 | 1.18 | iron-sulfur cluster-binding protein                        |
| DVU1812 | coxB   | -0.69 | 1.17 | cytochrome c oxidase, subunit II, putative                 |
| DVU1815 |        | -0.71 | 1.24 | cytochrome c oxidase, subunit I, putative                  |
| DVU1921 | hynB-1 | 0.95  | 1.03 | periplasmic [NiFe] hydrogenase, small subunit, isozyme 1   |
| DVU1922 | hynA-1 | 0.96  | 1.09 | periplasmic [NiFe] hydrogenase, large subunit, isozyme 1   |
| DVU1974 |        | -0.61 | 1.04 | pyridine nucleotide-disulfide oxidoreductase               |
| DVU2042 | hdrA   | 1.42  | 2.03 | heterodisulfide reductase, A subunit                       |
| DVU2103 |        | -1.09 | 1.81 | iron-sulfur cluster-binding/ATPase domain protein          |
| DVU2201 | b3011  | -1.00 | 1.82 | alcohol dehydrogenase, iron-containing                     |
| DVU2272 |        | 0.90  | 1.55 | formate acetyltransferase, putative                        |
| DVU2285 |        | 1.37  | 1.92 | L-lactate permease family protein                          |
| DVU2286 |        | 1.59  | 2.49 | hydrogenase, CooM subunit, putative                        |
| DVU2288 |        | 1.67  | 2.56 | hydrogenase, CooL subunit, putative                        |
| DVU2289 | b2488  | 1.45  | 2.38 | hydrogenase, CooX subunit, putative                        |
| DVU2290 |        | 1.73  | 2.77 | hydrogenase, CooU subunit, putative                        |
| DVU2291 |        | 1.27  | 2.07 | carbon monoxide-induced hydrogenase CooH, putative         |
| DVU2293 | cooF   | 1.13  | 1.74 | iron-sulfur protein CooF                                   |
| DVU2318 | rbr2   | -1.09 | 1.36 | rubrerythrin, putative                                     |
| DVU2399 |        | 1.03  | 1.43 | hydrogenase, putative                                      |
| DVU2401 |        | 1.02  | 1.27 | hydrogenase, iron-sulfur cluster-binding subunit, putative |
| DVU2403 | hdrB   | 1.10  | 1.62 | heterodisulfide reductase, B subunit                       |
| DVU2405 |        | 2.94  | 3.51 | alcohol dehydrogenase, iron-containing                     |
| DVU2422 |        | -0.93 | 1.61 | nitroreductase family protein                              |
| DVU2451 |        | 0.81  | 1.13 | L-lactate permease family protein                          |
| DVU2481 | fdoH   | -0.63 | 1.15 | formate dehydrogenase, beta subunit, putative              |
| DVU2680 | fld    | -5.19 | 6.67 | flavodoxin, iron-repressed                                 |
| DVU2683 |        | 0.63  | 1.08 | L-lactate permease family protein                          |
| DVU2793 |        | -0.59 | 1.05 | electron transport complex protein RnfD, putative          |
| DVU2794 |        | -0.63 | 1.16 | NADH:quinone oxidoreductase subunit RnfG                   |
| DVU3025 | por    | 1.96  | 2.51 | pyruvate-ferredoxin oxidoreductase                         |
| DVU3026 |        | 1.17  | 1.98 | L-lactate permease family protein                          |
| DVU3041 |        | -0.89 | 1.56 | cytochrome c553                                            |
| DVU3094 | rbr    | -1.15 | 1.44 | rubrerythrin                                               |
| DVU3134 | glpK   | -0.78 | 1.07 | glycerol kinase                                            |

**FUNCTION UNKNOWN**

| Gene #  | ID   | $\log_2 R$ | Absolute Z-score | Annotation                                                     |
|---------|------|------------|------------------|----------------------------------------------------------------|
| DVU0077 |      | -0.65      | 1.03             | conserved hypothetical protein                                 |
| DVU0147 |      | 5.76       | 9.79             | lipoprotein, putative                                          |
| DVU0186 |      | -1.57      | 2.61             | conserved hypothetical protein                                 |
| DVU0308 |      | 1.72       | 2.39             | membrane protein, putative                                     |
| DVU0359 |      | 1.56       | 1.28             | HesB-like domain                                               |
| DVU0439 |      | 0.59       | 1.03             | YCII-related domain protein                                    |
| DVU0522 | yviF | 0.58       | 1.00             | conserved hypothetical protein                                 |
| DVU0573 | creA | -0.78      | 1.33             | creA protein                                                   |
| DVU0595 |      | -0.60      | 1.07             | conserved hypothetical protein                                 |
| DVU0859 |      | 0.76       | 1.29             | hypothetical protein                                           |
| DVU0912 |      | 0.69       | 1.18             | conserved domain protein                                       |
| DVU0915 |      | 0.58       | 1.06             | conserved hypothetical protein                                 |
| DVU0943 |      | 1.12       | 1.91             | membrane protein, putative                                     |
| DVU1019 |      | -0.61      | 1.10             | conserved domain protein                                       |
| DVU1087 |      | -1.40      | 2.48             | conserved hypothetical protein                                 |
| DVU1239 |      | 0.79       | 1.36             | membrane protein, putative                                     |
| DVU1545 |      | 2.03       | 3.68             | hemolysin-type calcium-binding repeat/calx-beta domain protein |
| DVU1601 |      | -0.77      | 1.30             | ATP-dependent Clp protease adaptor protein ClpS                |
| DVU1618 |      | -0.73      | 1.33             | iojap-related protein                                          |
| DVU1781 |      | -1.27      | 2.19             | conserved hypothetical protein                                 |
| DVU1969 |      | -0.77      | 1.20             | hypothetical protein                                           |

|          |  |       |      |                                          |
|----------|--|-------|------|------------------------------------------|
| DVU2108  |  | -3.47 | 4.99 | MTH1175-like domain family protein       |
| DVU2259  |  | -0.66 | 1.16 | conserved hypothetical protein TIGR01033 |
| DVU2398  |  | 1.39  | 1.77 | conserved hypothetical protein           |
| DVU2590  |  | -0.67 | 1.10 | sensory box protein                      |
| DVU2672  |  | -1.08 | 1.89 | membrane protein, putative               |
| DVUA0061 |  | 1.51  | 1.36 | membrane protein, putative               |

**GENERAL FUNCTION PREDICTION ONLY**

| Gene #   | ID   | $\log_2 R$ | Absolute Z-score | Annotation                                     |
|----------|------|------------|------------------|------------------------------------------------|
| DVU0132  |      | 0.83       | 1.38             | membrane protein, putative                     |
| DVU0189  |      | 4.07       | 5.93             | phage/plasmid primase, P4 family               |
| DVU0197  |      | 2.52       | 3.87             | phage portal protein, lambda family            |
| DVU0338  |      | 0.82       | 1.39             | hydrolase, haloacid dehalogenase-like family   |
| DVU0367  |      | -0.57      | 1.01             | Ser/Thr protein phosphatase family protein     |
| DVU0770  |      | 0.97       | 1.44             | membrane protein, putative                     |
| DVU0886  |      | -0.80      | 1.34             | thioesterase family protein                    |
| DVU1062  |      | -0.66      | 1.09             | conserved hypothetical protein                 |
| DVU1258  | glnN | 1.13       | 1.74             | glutamine synthetase, type III                 |
| DVU1294  |      | 0.71       | 1.07             | conserved hypothetical protein                 |
| DVU1529  |      | -1.08      | 1.92             | decarboxylase family protein                   |
| DVU1664  |      | -1.07      | 1.82             | GTP-binding protein                            |
| DVU1768  |      | 1.15       | 1.61             | GTP-binding protein                            |
| DVU1769  | hydA | 2.23       | 1.86             | periplasmic [Fe] hydrogenase, large subunit    |
| DVU1824  |      | -0.61      | 1.04             | conserved hypothetical protein                 |
| DVU1968  |      | -0.62      | 1.09             | oxidoreductase, putative                       |
| DVU2024  |      | 0.77       | 1.29             | conserved hypothetical protein                 |
| DVU2058  |      | 0.88       | 1.27             | HDIG domain protein                            |
| DVU2292  | hypA | 1.07       | 1.64             | hydrogenase nickel insertion protein HypA      |
| DVU2379  | pqqL | -2.78      | -4.19            | peptidase, M16 family, putative                |
| DVU2386  | oppC | -1.05      | 1.46             | ABC transporter, permease protein              |
| DVU2421  | dmpI | -1.04      | 1.83             | 4-oxalocrotonate tautomerase family protein    |
| DVU2568  | cpsA | -0.98      | 1.57             | peptidase, M20/M25/M40 family                  |
| DVU2671  |      | -0.67      | 1.18             | HDIG/HD/KH domain protein                      |
| DVU2783  |      | 0.62       | 1.03             | membrane protein, putative                     |
| DVU2838  |      | -0.76      | 1.12             | conserved hypothetical protein                 |
| DVU3295  |      | -0.77      | 1.33             | hemolysin III                                  |
| DVUA0129 | cas3 | 1.34       | 1.03             | CRISPR-associated helicase Cas3 domain protein |

**INORGANIC ION TRANSPORT AND METABOLISM**

| Gene #  | ID   | $\log_2 R$ | Absolute Z-score | Annotation                                                                         |
|---------|------|------------|------------------|------------------------------------------------------------------------------------|
| DVU0053 |      | -0.85      | 1.43             | sulfate permease, putative                                                         |
| DVU0164 |      | -1.30      | 1.61             | cation efflux family protein                                                       |
| DVU0177 | modA | -1.95      | 1.85             | molybdenum ABC transporter, periplasmic molybdenum-binding protein                 |
| DVU0180 | modC | -1.10      | 1.23             | ATP-binding component of molybdate ABC transporter                                 |
| DVU0181 | modB | -1.33      | 1.64             | molybdenum ABC transporter, permease protein                                       |
| DVU0647 |      | -0.94      | 1.44             | iron compound ABC transporter, periplasmic iron compound-binding protein, putative |
| DVU0648 | fepC | -0.87      | 1.40             | iron compound ABC transporter, ATP-binding protein                                 |
| DVU0949 |      | -0.86      | 1.38             | conserved domain protein                                                           |
| DVU1058 | nikM | -0.61      | 1.09             | component of nickel ABC transport system                                           |
| DVU1085 | phoU | -0.70      | 1.18             | phosphate transport system protein PhoU                                            |
| DVU1295 | sat  | 0.75       | 1.17             | sulfate adenylyltransferase                                                        |
| DVU1340 | zur  | -0.70      | 1.00             | Zinc uptake transcriptional regulator ZUR (Fur family)                             |
| DVU1342 | znuB | -1.19      | 1.89             | ATPase component of zinc ABC transporter                                           |
| DVU1343 | znuA | -1.19      | 1.56             | periplasmic component of zinc ABC transporter                                      |
| DVU2306 |      | 0.89       | 1.13             | phosphate transporter family protein                                               |

|         |      |       |      |                                                  |
|---------|------|-------|------|--------------------------------------------------|
| DVU2324 |      | -0.87 | 1.27 | copper-translocating P-type ATPase               |
| DVU2325 | merP | -0.90 | 1.58 | mercuric transport protein periplasmic component |
| DVU2462 |      | -0.78 | 1.17 | oligopeptide ABC transporter, permease protein   |
| DVU2571 | feoB | -4.71 | 6.36 | ferrous iron transport protein B                 |
| DVU2572 | feoA | -4.60 | 7.26 | ferrous iron transport protein A                 |
| DVU2574 | feoA | -2.00 | 2.59 | ferrous iron transporter component feoA          |
| DVU2617 |      | -0.83 | 1.16 | sodium/calcium exchanger family protein          |
| DVU2752 |      | 1.84  | 1.92 | rhodanese-like domain protein                    |
| DVU2776 | dsrC | 0.75  | 1.12 | dissimilatory sulfite reductase, gamma subunit   |
| DVU2800 |      | -0.76 | 1.24 | heavy metal translocating P-type ATPase          |
| DVU3095 | PerR | -0.79 | 1.04 | peroxide-responsive regulator PerR               |
| DVU3330 |      | -4.66 | 6.70 | hypothetical iron-regulated P-type ATPase        |
| DVU3332 |      | -2.15 | 3.38 | heavy metal translocating P-type ATPase          |

**INTRACELLULAR TRAFFICKING, SECRETION AND VESICULAR TRANSPORT**

| Gene #   | ID     | $\log_2 R$ | Absolute Z-score | Annotation                                           |
|----------|--------|------------|------------------|------------------------------------------------------|
| DVU1013  |        | -1.01      | 1.37             | type I secretion outer membrane protein, TolC family |
| DVU1262  | pilT-1 | -0.99      | 1.62             | twitching motility protein PilT                      |
| DVU1263  | pppA   | -1.06      | 1.71             | type IV prepilin-like proteins leader peptidase      |
| DVU2117  |        | -1.20      | 1.90             | membrane protein, putative                           |
| DVU2118  |        | -0.88      | 1.16             | conserved hypothetical protein                       |
| DVU2119  | cpaC   | -1.23      | 1.73             | type II/III secretion system protein                 |
| DVU2124  |        | -0.84      | 1.20             | conserved hypothetical protein                       |
| DVU2388  | tolQ-1 | -1.34      | 2.14             | tolQ protein                                         |
| DVU2389  | tolR   | -2.00      | 2.50             | biopolymer transport protein, ExbD/TolR family       |
| DVU2871  |        | 1.46       | 1.53             | minor capsid protein C                               |
| DVU2922  | secE   | 0.78       | 1.21             | preprotein translocase, SecE subunit                 |
| DVU3097  |        | 0.71       | 1.33             | outer membrane efflux protein                        |
| DVUA0103 | invX   | 1.35       | 1.13             | type III secretion protein, HrpO family              |
| DVUA0119 | sctN   | 1.20       | 1.01             | type III secretion system ATPase                     |

**LIPID TRANSPORT AND METABOLISM**

| Gene #  | ID   | $\log_2 R$ | Absolute Z-score | Annotation                                                         |
|---------|------|------------|------------------|--------------------------------------------------------------------|
| DVU1344 | ispG | -0.65      | 1.16             | 1-hydroxy-2-methyl-2-(E)-butenyl 4-diphosphate synthase            |
| DVU1846 | pgsA | -0.73      | 1.21             | CDP-diacylglycerol--glycerol-3-phosphate 3-phosphatidyltransferase |
| DVU2250 |      | -0.59      | 1.02             | AMP-binding protein                                                |

**NUCLEOTIDE TRANSPORT AND METABOLISM**

| Gene #  | ID  | $\log_2 R$ | Absolute Z-score | Annotation                                                |
|---------|-----|------------|------------------|-----------------------------------------------------------|
| DVU1528 |     | -0.83      | 1.50             | cytidine/deoxycytidylate deaminase family protein         |
| DVU1588 | hpt | -0.59      | 1.03             | hypoxanthine phosphoribosyltransferase                    |
| DVU2947 |     | -0.68      | 1.17             | anaerobic ribonucleoside-triphosphate reductase, putative |

**POSTTRANSLATIONAL MODIFICATION, PROTEIN TURNOVER, CHAPERONES**

| Gene #  | ID   | $\log_2 R$ | Absolute Z-score | Annotation                                           |
|---------|------|------------|------------------|------------------------------------------------------|
| DVU0684 | hflK | -0.84      | 1.50             | hflK protein, putative                               |
| DVU0812 | grpE | 0.94       | 1.66             | heat shock protein GrpE                              |
| DVU1228 | tpX  | -0.65      | 1.09             | thiol peroxidase                                     |
| DVU1334 | tig  | -0.81      | 1.42             | trigger factor                                       |
| DVU1337 | lon  | -0.59      | 1.06             | ATP-dependent protease La                            |
| DVU1602 | clpA | -0.84      | 1.52             | ATP-dependent Clp protease, ATP-binding subunit ClpA |
| DVU1811 |      | -0.85      | 1.39             | protoheme IX farnesyltransferase, putative           |
| DVU1849 | pcm  | -0.99      | 1.73             | protein-L-isoaspartate O-methyltransferase           |

|         |        |       |      |                                                      |
|---------|--------|-------|------|------------------------------------------------------|
| DVU1873 | ppiB-2 | -0.72 | 1.32 | peptidyl-prolyl cis-trans isomerase B                |
| DVU1874 | clpB   | -0.74 | 1.33 | ATP-dependent Clp protease, ATP-binding subunit ClpB |
| DVU1876 | dnaJ   | -0.66 | 1.05 | dnaJ protein, putative                               |
| DVU1976 | groEL  | -0.63 | 1.09 | chaperonin, 60 kDa                                   |
| DVU1977 | groES  | -0.73 | 1.27 | chaperonin, 10 kDa                                   |
| DVU2019 |        | 1.16  | 1.00 | conserved hypothetical protein                       |
| DVU2247 | ahpC   | -2.70 | 3.64 | alkyl hydroperoxide reductase C                      |
| DVU2271 | pflA   | -0.95 | 1.04 | pyruvate formate-lyase activating enzyme, putative   |
| DVU2407 |        | 0.86  | 1.24 | conserved hypothetical protein                       |
| DVU2441 | hspC   | -2.33 | 3.67 | heat shock protein, Hsp20 family                     |
| DVU2442 |        | -2.25 | 3.32 | heat shock protein, Hsp20 family                     |
| DVU3282 |        | -1.24 | 1.96 | ADP-ribosylglycohydrolase family protein             |

**REPLICATION, RECOMBINATION AND REPAIR**

| Gene #  | ID    | $\log_2 R$ | Absolute Z-score | Annotation                                        |
|---------|-------|------------|------------------|---------------------------------------------------|
| DVU0004 | gyrA  | -0.68      | 1.17             | DNA gyrase, A subunit                             |
| DVU0070 | yhaO  | 2.80       | 2.95             | Ser/Thr protein phosphatase family protein        |
| DVU1757 |       | -0.90      | 1.50             | site-specific recombinase, phage integrase family |
| DVU1795 | hup-3 | 0.77       | 1.18             | DNA-binding protein HU                            |
| DVU1899 |       | 0.73       | 1.17             | DNA repair protein RecO, putative                 |
| DVU2197 |       | -0.83      | 1.42             | site-specific recombinase, phage integrase family |

**SECONDARY METABOLITES BIOSYNTHESIS, TRANSPORT AND CATABOLISM**

| Gene #  | ID | $\log_2 R$ | Absolute Z-score | Annotation                     |
|---------|----|------------|------------------|--------------------------------|
| DVU0026 |    | 0.66       | 1.10             | conserved hypothetical protein |

**SIGNAL TRANSDUCTION MECHANISMS**

| Gene #  | ID    | $\log_2 R$ | Absolute Z-score | Annotation                                                              |
|---------|-------|------------|------------------|-------------------------------------------------------------------------|
| DVU0089 |       | -0.86      | 1.23             | conserved hypothetical protein                                          |
| DVU0144 | rfaE  | 1.85       | 2.78             | cytidyltransferase-related protein                                      |
| DVU0145 |       | 5.61       | 10.29            | response regulator                                                      |
| DVU0261 |       | -0.62      | 1.02             | universal stress protein family                                         |
| DVU0344 |       | 3.00       | 4.70             | methyl-accepting chemotaxis protein                                     |
| DVU0423 |       | -0.92      | 1.48             | universal stress protein family                                         |
| DVU0598 |       | 2.11       | 2.77             | carbon starvation protein A, putative                                   |
| DVU0599 |       | 1.65       | 2.82             | carbon starvation protein A, putative                                   |
| DVU0608 |       | -1.23      | 1.47             | methyl-accepting chemotaxis protein                                     |
| DVU0622 |       | 1.09       | 1.55             | sensor histidine kinase/response regulator                              |
| DVU0666 |       | 0.97       | 1.66             | HD domain protein                                                       |
| DVU0668 |       | -0.99      | 1.70             | methyl-accepting chemotaxis protein                                     |
| DVU0700 |       | -0.66      | 1.08             | methyl-accepting chemotaxis protein                                     |
| DVU0722 |       | -0.71      | 1.11             | response regulator                                                      |
| DVU0763 | gdp   | -1.91      | 3.08             | GGDEF domain protein                                                    |
| DVU1020 |       | -0.98      | 1.68             | HD domain/sensory box protein                                           |
| DVU1747 |       | -0.70      | 1.18             | ATPase, histidine kinase-, DNA gyrase B-, and HSP90-like domain protein |
| DVU2067 |       | 1.11       | 1.53             | GGDEF domain protein                                                    |
| DVU2114 | atoC  | -1.30      | 2.05             | sigma-54 dependent transcriptional regulator/response regulator         |
| DVU2394 | ntrC1 | 0.92       | 1.23             | sigma-54 dependent transcriptional regulator/response regulator         |
| DVU2615 |       | -0.90      | 1.45             | bacterial extracellular solute-binding protein, family 3                |
| DVU2675 |       | -1.26      | 1.88             | DNA-binding response regulator, LuxR family                             |
| DVU2679 |       | -1.05      | 1.75             | sensory box histidine kinase/response regulator                         |
| DVU2954 |       | -0.69      | 1.12             | GGDEF domain protein                                                    |
| DVU3021 |       | -2.66      | 3.18             | HDIG domain protein                                                     |
| DVU3023 | atoC  | 1.15       | 1.47             | sigma-54 dependent DNA-binding response regulator                       |

|         |  |       |      |                                                 |
|---------|--|-------|------|-------------------------------------------------|
| DVU3035 |  | -1.72 | 2.58 | methyl-accepting chemotaxis protein, putative   |
| DVU3266 |  | -2.17 | 2.81 | conserved hypothetical protein                  |
| DVU3269 |  | -0.98 | 1.68 | sensory box histidine kinase/response regulator |

**TRANSCRIPTION**

| <i>Gene #</i> | <i>ID</i> | <i>log<sub>2</sub>R</i> | <i>Absolute Z-score</i> | <i>Annotation</i>                            |
|---------------|-----------|-------------------------|-------------------------|----------------------------------------------|
| DVU0529       | rrf2      | 1.64                    | 2.41                    | Rrf2 protein                                 |
| DVU0530       | rrf1      | 2.06                    | 2.78                    | Rrf1 protein                                 |
| DVU0682       |           | 1.49                    | 1.92                    | DNA-binding protein, putative                |
| DVU1571       | rho       | -0.96                   | 1.70                    | transcription termination factor Rho         |
| DVU1645       |           | -0.75                   | 1.11                    | transcriptional regulator, ArsR family       |
| DVU1690       |           | -0.69                   | 1.08                    | transcriptional regulator, TetR family       |
| DVU1760       |           | 1.65                    | 2.23                    | transcriptional regulator, TetR family       |
| DVU2111       |           | -0.56                   | 1.03                    | transcriptional regulator, LysR family       |
| DVU2246       |           | -0.69                   | 1.28                    | S1 RNA binding domain protein                |
| DVU2364       |           | 0.96                    | 1.34                    | aminotransferase, classes I and II           |
| DVU2378       | foxR      | -3.50                   | 5.75                    | transcriptional regulator, AraC family       |
| DVU2423       |           | -1.00                   | 1.57                    | transcriptional regulator, putative          |
| DVU2686       |           | -0.81                   | 1.53                    | peptidase, S24 family                        |
| DVU2799       |           | -0.96                   | 1.66                    | transcriptional regulator, MarR family       |
| DVU2827       |           | -1.02                   | 1.61                    | sigma-54 dependent transcriptional regulator |
| DVU2923       | nusG      | 0.71                    | 1.17                    | transcription antitermination protein NusG   |
| DVU2988       | pspA      | -0.95                   | 1.55                    | phage shock protein A                        |
| DVU3080       |           | -1.25                   | 1.48                    | transcriptional regulator, putative          |
| DVU3131       |           | -1.07                   | 1.36                    | transcriptional regulator, putative          |
| DVU3245       | greA      | -0.96                   | 1.57                    | transcription elongation factor GreA         |
| DVUA0086      |           | 2.05                    | 1.59                    | response regulator                           |

**TRANSLATION, RIBOSOMAL STRUCTURE AND BIOGENESIS**

| <i>Gene #</i> | <i>ID</i> | <i>log<sub>2</sub>R</i> | <i>Absolute Z-score</i> | <i>Annotation</i>                                     |
|---------------|-----------|-------------------------|-------------------------|-------------------------------------------------------|
| DVU0500       | selB      | -0.64                   | 1.07                    | selenocysteine-specific translation elongation factor |
| DVU0958       | rplI      | 0.63                    | 1.12                    | ribosomal protein L9                                  |
| DVU1248       | argS      | -0.59                   | 1.09                    | arginyl-tRNA synthetase                               |
| DVU1315       | rplE      | 0.74                    | 1.32                    | ribosomal protein L5                                  |
| DVU1322       | rplO      | 0.67                    | 1.10                    | ribosomal protein L15                                 |
| DVU1666       | efp       | -0.83                   | 1.42                    | translation elongation factor P                       |
| DVU2518       | rplM      | -0.62                   | 1.10                    | ribosomal protein L13                                 |
| DVU2536       | rplI      | -0.61                   | 1.07                    | ribosomal protein L35                                 |
| DVU2920       | tuf       | 0.59                    | 1.04                    | translation elongation factor Tu                      |
| DVU2921       | rplG      | 0.84                    | 1.44                    | ribosomal protein L33                                 |
| DVU2927       | rplL      | 0.68                    | 1.22                    | ribosomal protein L7/L12                              |



**SUPPLEMENTAL TABLE 2: TOP 30 UP- AND DOWN-REGULATED OPEN READING  
FRAMES***UP-REGULATED*

| <b>Gene #</b> | <b>ID</b> | <b>log<sub>2</sub>R</b> | <b>Z-score</b> | <b>Annotation</b>                                              |
|---------------|-----------|-------------------------|----------------|----------------------------------------------------------------|
| DVU0150       |           | 7.35                    | 12.21          | membrane protein, putative                                     |
| DVU0147       |           | 5.76                    | 9.79           | lipoprotein, putative                                          |
| DVU0145       |           | 5.61                    | 10.29          | response regulator                                             |
| DVUA0048      |           | 4.25                    | 2.35           | exopolysaccharide production protein, putative                 |
| DVU0189       |           | 4.07                    | 5.93           | phage/plasmid primase, P4 family                               |
| DVU0146       |           | 3.46                    | 5.94           | hypothetical protein                                           |
| DVU2652       |           | 3.07                    | 4.67           | hypothetical protein                                           |
| DVU0344       |           | 3.00                    | 4.70           | methyl-accepting chemotaxis protein                            |
| DVU2405       |           | 2.94                    | 3.51           | alcohol dehydrogenase, iron-containing                         |
| DVU0315       | flgC      | 2.82                    | 4.30           | flagellar basal-body rod protein FlgC                          |
| DVU0070       | yhaO      | 2.80                    | 2.95           | Ser/Thr protein phosphatase family protein                     |
| DVU0316       | flgB      | 2.68                    | 3.94           | flagellar basal-body rod protein FlgB                          |
| DVUA0023      |           | 2.60                    | 1.37           | ABC transporter, permease protein, putative                    |
| DVU2445       |           | 2.58                    | 4.42           | hypothetical protein                                           |
| DVU0197       |           | 2.52                    | 3.87           | phage portal protein, lambda family                            |
| DVU2444       | flaB3     | 2.26                    | 3.95           | flagellin                                                      |
| DVU1769       | hydA      | 2.23                    | 1.86           | periplasmic [Fe] hydrogenase, large subunit                    |
| DVU0536       | hmcA      | 2.22                    | 2.85           | high-molecular weight cytochrome c                             |
| DVUA0085      |           | 2.18                    | 1.38           | conserved hypothetical protein                                 |
| DVU0598       |           | 2.11                    | 2.77           | carbon starvation protein A, putative                          |
| DVU0644       |           | 2.11                    | 3.00           | hypothetical protein                                           |
| DVU0173       | phsA      | 2.08                    | 3.41           | thiosulfate reductase                                          |
| DVU0530       | rrf1      | 2.06                    | 2.89           | Rrf1 protein                                                   |
| DVU1770       | hydB      | 2.06                    | 1.54           | periplasmic [Fe] hydrogenase, small subunit                    |
| DVUA0086      |           | 2.05                    | 1.59           | response regulator                                             |
| DVU1545       |           | 2.03                    | 3.68           | hemolysin-type calcium-binding repeat/calx-beta domain protein |
| DVUA0096      |           | 1.99                    | 1.00           | major facilitator superfamily protein                          |
| DVU3025       | por       | 1.96                    | 2.51           | pyruvate-ferredoxin oxidoreductase                             |
| DVU1178       |           | 1.94                    | 1.93           | hypothetical protein                                           |
| DVU0531       | hmcF      | 1.93                    | 2.76           | HmcF, 52.7 kd protein in hmc operon                            |

*DOWN-REGULATED*

| <b>Gene #</b> | <b>ID</b> | <b>log<sub>2</sub>R</b> | <b>Z-score</b> | <b>Annotation</b>                         |
|---------------|-----------|-------------------------|----------------|-------------------------------------------|
| DVU2681       |           | -5.33                   | 7.58           | hypothetical protein                      |
| DVU0303       |           | -5.29                   | 5.10           | hypothetical protein                      |
| DVU2680       | fld       | -5.19                   | 6.67           | flavodoxin, iron-repressed                |
| DVU0273       |           | -4.97                   | 7.89           | conserved hypothetical protein            |
| DVU2571       | feoB      | -4.71                   | 6.36           | ferrous iron transport protein B          |
| DVU3330       |           | -4.66                   | 6.70           | hypothetical iron-regulated P-type ATPase |
| DVU2572       | feoA      | -4.60                   | 7.26           | ferrous iron transport protein A          |
| DVU2383       |           | -4.37                   | 6.14           | tonB dependent receptor domain protein    |
| DVU3331       |           | -3.89                   | 5.51           | hypothetical protein                      |

|         |      |       |      |                                                                           |
|---------|------|-------|------|---------------------------------------------------------------------------|
| DVU0304 |      | -3.67 | 2.44 | hypothetical protein                                                      |
| DVU2381 |      | -3.67 | 5.37 | conserved hypothetical protein                                            |
| DVU2378 | foxR | -3.50 | 5.75 | transcriptional regulator, AraC family                                    |
| DVU2108 |      | -3.47 | 4.99 | MTH1175-like domain family protein                                        |
| DVU2109 | mrp  | -3.20 | 4.66 | MTH1175-like domain family protein                                        |
| DVU3333 |      | -3.11 | 5.06 | hypothetical protein                                                      |
| DVU2380 | atpX | -3.02 | 4.75 | ABC transporter, ATP-binding protein                                      |
| DVU3329 |      | -3.00 | 5.08 | hypothetical protein                                                      |
| DVU2573 |      | -2.91 | 4.83 | hypothetical protein                                                      |
| DVU0822 |      | -2.89 | 2.21 | hypothetical protein                                                      |
| DVU2379 | pqqL | -2.78 | 4.19 | peptidase, M16 family, putative                                           |
| DVU2382 |      | -2.74 | 4.35 | conserved domain protein                                                  |
| DVU0805 |      | -2.73 | 3.21 | hypothetical protein                                                      |
| DVU2247 | ahpC | -2.70 | 3.64 | alkyl hydroperoxide reductase C                                           |
| DVU3021 |      | -2.66 | 3.18 | HDIG domain protein                                                       |
| DVU0806 |      | -2.59 | 3.01 | chemotaxis protein CheY, putative                                         |
| DVU0650 |      | -2.56 | 2.85 | chelataase, putative                                                      |
| DVU0821 |      | -2.53 | 2.05 | conserved hypothetical protein                                            |
| DVU2297 |      | -2.48 | 3.69 | glycine/betaine/L-proline ABC transporter,<br>periplasmic-binding protein |
| DVU2384 |      | -2.44 | 2.50 | ABC transporter, periplasmic substrate-binding<br>protein                 |
| DVU2390 |      | -2.34 | 3.23 | TonB domain protein                                                       |
