# Supplementary material
Source: PubMed Central journal article supplement (PMC2737945)
Supplement: supp_191_18_5793__2.pdf [file supp_191_18_5793__2.pdf]

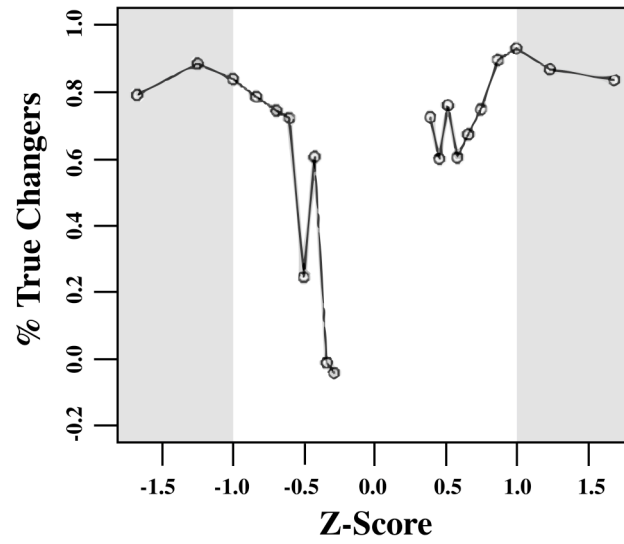

**Supplemental Figure 1:** Operon-based estimates of local accuracy for Z-scores derived from expression ratios of syntrophically grown *D. vulgaris* Hildenborough compared with sulfate-limited monocultures.

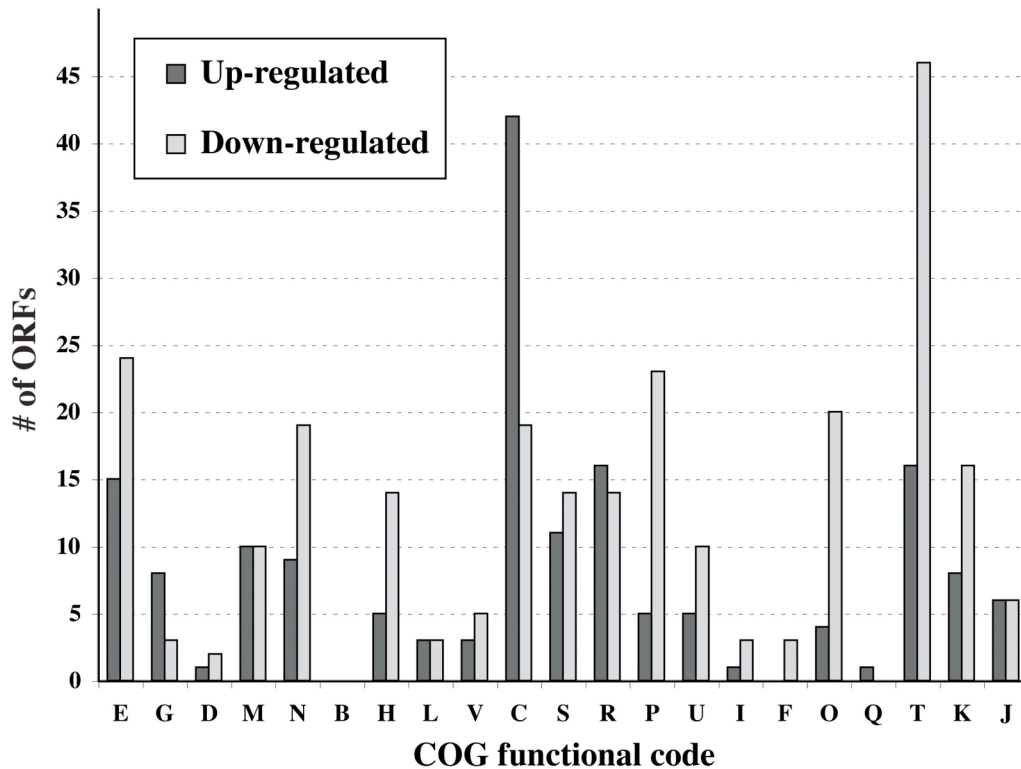

**Supplemental Figure 2:** Open-reading frames differentially expressed during syntrophic growth plotted according to function as defined by the cluster of orthologous groups (COG). Open reading frames were considered to have statistically significant up- or down-regulation if the absolute value of the Z-score was greater than 1.0 (as determined through operon-based estimates of local accuracy). Categories are amino acid transport (E), carbohydrate transport and metabolism (G), cell division and chromosome partitioning (D), cell envelope biogenesis (M), cell motility and secretion (N), chromatin structure and dynamics (B), coenzyme metabolism (H), DNA replication, recombination and repair (L), defense mechanisms (V), energy production and conservation (C), function unknown (S), general function prediction only (R), inorganic ion transport and metabolism (P), intracellular trafficking and secretion (U), lipid metabolism (I), nucleotide transport and metabolism (F), post-translational modification, protein

turnover, chaperones (O), secondary metabolites biosynthesis, transport and catabolism (Q), signal transduction mechanisms (T), transcription (K) and translation, ribosomal structures and biogenesis (J).
